# Supplementary material for: ACEtimation—The Combined Effect of Adverse Childhood Experiences on Violence, Health-Harming Behaviors, and Mental Ill-Health: Findings across England and Wales
Source: MDPI journal article supplement (doi:10.3390/ijerph20176633), 2023-08-23
Supplement: s1 [file s1]

**Supplementary S1**

**Table S1.** Survey stratification, recruitment methods and sample sizes .....pg2

**Table S2.** Derivation of predictor and outcome variables from questionnaires across surveys.....pg3

**Table S3.** Distribution of outcome responses across surveys.....pg6

**Table S4a/b.** Relative Risk Ratios for violence outcomes and substance use behaviors by demographic characteristics (RR [95% CIs], p values), Relative Risk Ratios for health harming behaviors and mental health outcomes by demographic characteristics (RR [95% CIs], p values).....pg 7

**Table S5.** Estimated Marginal Means for all individual ACE exposures and combinations, including excess risk.....pg 9

**Supplementary S2** Methods for calculating additive risk (adapted methods from Anderson et al., 2005).....pg 12

## Supplementary S1

**Table S1.** Survey stratification, recruitment methods and sample sizes

| Study                        | Sampling stratification                                                         | Recruitment method          | Participation rate | Total sample | Included sample |
|------------------------------|---------------------------------------------------------------------------------|-----------------------------|--------------------|--------------|-----------------|
| England 2012 (Northwest)     | Deprivation quintile                                                            | Household survey            | 70.4%              | 1500         | 1421            |
| England 2013                 | English Administrative Regions (n=10), deprivation quintile                     | Household survey            | 53.5%              | 4010         | 3885            |
| England 2015 (South England) | Luton, Hertfordshire, Northamptonshire (n=3), deprivation/ ethnicity/urbanicity | Household survey            | 55.8%              | 5623         | 5454            |
| Wales 2015                   | Welsh Health Regions (n=7), deprivation quintile                                | Household survey            | 49.1%              | 2028         | 2028            |
| Wales 2017                   | Welsh Health Regions (n=7), deprivation quintile                                | Household survey            | 58.5%              | 2497         | 2497            |
| England 2020-21 (North West) | Welsh Health Regions (n=7), deprivation quintile, age group                     | Telephone and online survey | 30.8%              | 1895         | 1819            |
| Wales 2020-21                | Deprivation quintile, age group                                                 | Telephone and online survey | 36.4%              | 2976         | 2872            |
| England & Wales 2022         | Country quotas representative by age and sex                                    | Online survey               | N/A                | 1832         | 1740            |
|                              |                                                                                 |                             | Total              | <b>22361</b> | <b>21716</b>    |

**Table S2.** Derivation of predictor and outcome variables from questionnaires across surveys

| Variables                        | Questions used to derive response                                                                                                                                                                                                                   | Qualifying response                                   |
|----------------------------------|-----------------------------------------------------------------------------------------------------------------------------------------------------------------------------------------------------------------------------------------------------|-------------------------------------------------------|
| Child maltreatment               | How often did a parent or adult in your home ever hit, beat, kick, or physically hurt you in any way?<br>This does not include gentle smacking for punishment.                                                                                      | <i>Once or more than once to any of the questions</i> |
|                                  | How often did a parent or adult in your home ever swear at you, insult you, or put you down?                                                                                                                                                        |                                                       |
|                                  | Studies 1-5: How often did anyone at least 5 years older than you (including adults) ever....<br>...touch you sexually?<br>...try to make you touch them sexually?<br>...force you to have any type of sexual intercourse (oral, anal, or vaginal)? |                                                       |
|                                  | OR                                                                                                                                                                                                                                                  | OR                                                    |
|                                  | Studies 6-8: Did an adult or someone at least 5 years older than you sexually abuse you by touching you or making you undertake any sexual activity with them?                                                                                      | Yes                                                   |
| Witnessing violence              | How often did your parents or adults in your home ever slap, hit, kick, punch, or beat each other up?                                                                                                                                               | <i>Once; more than once</i>                           |
| Household dysfunction            | Did you live with anyone who was depressed, mentally ill, or suicidal?                                                                                                                                                                              | <i>A yes response to any/all of these questions.</i>  |
|                                  | Did you live with anyone who was a problem drinker or alcoholic?                                                                                                                                                                                    |                                                       |
|                                  | Did you live with anyone who used illegal street drugs or who abused prescription medications?                                                                                                                                                      |                                                       |
|                                  | Did you live with anyone who served time or was sentenced to serve time in a prison or young offenders' institution?                                                                                                                                |                                                       |
| Perpetrator of physical violence | Studies 1-3,5: How many times have you physically hit someone in the past 12 months?                                                                                                                                                                | <i>Once or more</i>                                   |
|                                  | Study 4: In the past 12 months, have you physically hit someone else?                                                                                                                                                                               | Yes                                                   |

|                                |                                                                                                                                                         |                                                                                        |
|--------------------------------|---------------------------------------------------------------------------------------------------------------------------------------------------------|----------------------------------------------------------------------------------------|
|                                | Studies 6-7: In the last 12 months have you hit another adult for any reason, including to defend yourself?                                             | Yes                                                                                    |
| Victim of physical violence    | Studies 1-3,5: How many times have you been physically hit in the past 12 months?                                                                       | Once or more                                                                           |
|                                | Study 4: In the past 12 months, have you been physically hit by someone else?                                                                           | Yes                                                                                    |
|                                | Studies 6,7: In the last 12 months have you been hit by an adult?                                                                                       | Yes                                                                                    |
| Incarceration                  | Studies 1-3,5: How many nights have you ever spent in prison, in jail or in a police station?                                                           | Yes                                                                                    |
|                                | Study 4: Have you ever spent a night locked up in a prison, in jail or in a police station?                                                             |                                                                                        |
| Binge drinking (Current)       | Studies 1-3,5: How often do you have 6 or more standard drinks on one occasion?                                                                         | Weekly; Daily or almost Daily                                                          |
|                                | Studies 6-8: Currently, on how many days a week do you drink five or more alcoholic drinks in one day (e.g., glasses of wine, beers, shots of spirits)? | 1+ Days                                                                                |
| Cannabis use (ever)            | Studies 1-5,8: How often, if ever, have you taken cannabis?                                                                                             | Used in the past 12 months; Used but not in the last 12 months; Used in the past month |
|                                | Studies 6,7: Please can you tell us if you have ever used the following and if you have used them in the last 12 months...Cannabis                      |                                                                                        |
| Smoking (current)              | Studies 1-5: In terms of smoking (tobacco), which best describes you?                                                                                   | I smoke daily; I smoke occasionally but not daily                                      |
|                                | Studies 6,7: Please can you tell us if you have ever used the following and if you have used them in the last 12 months... Cigarettes                   | I currently smoke tobacco                                                              |
|                                | Study 8: In terms of smoking tobacco, which best describes you?                                                                                         | Used in the past 12 months                                                             |
| Sexually transmitted infection | Studies 1-4, 6-8: Has a doctor or nurse ever told you that you have a sexually transmitted infection (e.g., chlamydia, HIV/AIDS, syphilis)              | Yes                                                                                    |
| Underage sexual intercourse    | Studies 1-4: How old were you the first time you had sexual intercourse?                                                                                | <16 years of age                                                                       |

|                              |                                                                                                                              |                                     |
|------------------------------|------------------------------------------------------------------------------------------------------------------------------|-------------------------------------|
| Accidental teenage pregnancy | Studies 1-4; Did you ever accidentally get pregnant or accidentally get someone else pregnant before you were aged 18 years? | <i>Yes once, yes more than once</i> |
| Life satisfaction            | Studies 1-4; how satisfied are you with your life on a scale of 1-10?                                                        | <i>Score of 5 <math>\leq</math></i> |
| Any mental illness diagnosis | Studies 6-8; Have you ever been told by doctor have mental illness, including depression and anxiety                         | <i>Yes</i>                          |

**Table S3.** Distribution of outcome responses across surveys

| Study                        | Outcome variables           |                                  |               |                                |              |         |                                |                         |                              |                               |                              |
|------------------------------|-----------------------------|----------------------------------|---------------|--------------------------------|--------------|---------|--------------------------------|-------------------------|------------------------------|-------------------------------|------------------------------|
|                              | <i>Antisocial outcomes</i>  |                                  |               | <i>Risky health behaviours</i> |              |         |                                |                         |                              | <i>Mental health outcomes</i> |                              |
|                              | Victim of physical violence | Perpetrator of physical violence | Incarceration | Binge drinking                 | Cannabis use | Smoking | Sexually transmitted infection | Early sexual initiation | Accidental teenage pregnancy | Low life satisfaction         | Any Mental illness diagnosis |
| England 2012 (North West)    | ✓                           | ✓                                | ✓             | ✓                              | ✓            | ✓       | ✓                              | ✓                       | ✓                            | ✓                             |                              |
| England 2013                 | ✓                           | ✓                                | ✓             | ✓                              | ✓            | ✓       | ✓                              | ✓                       | ✓                            | ✓                             |                              |
| England 2015 (South)         | ✓                           | ✓                                | ✓             | ✓                              | ✓            | ✓       | ✓                              | ✓                       | ✓                            | ✓                             |                              |
| Wales 2015                   | ✓                           | ✓                                | ✓             | ✓                              | ✓            | ✓       | ✓                              | ✓                       | ✓                            |                               |                              |
| Wales 2017                   | ✓                           | ✓                                | ✓             |                                | ✓            | ✓       |                                |                         |                              |                               |                              |
| England (North West) 2020-21 | ✓                           | ✓                                |               | ✓                              | ✓            | ✓       | ✓                              |                         |                              |                               | ✓                            |
| Wales 2020-21                | ✓                           | ✓                                |               | ✓                              | ✓            | ✓       | ✓                              |                         |                              |                               | ✓                            |
| England & Wales 2022         |                             |                                  |               | ✓                              | ✓            | ✓       | ✓                              |                         |                              |                               | ✓                            |
| Yes responses (n)            | 938                         | 750                              | 1112          | 2999                           | 3843         | 4025    | 430                            | 1888                    | 894                          | 1265                          | 1743                         |
| No responses (n)             | 17947                       | 18126                            | 14140         | 16195                          | 17788        | 11256   | 17624                          | 8972                    | 11788                        | 9464                          | 3550                         |

**Table S4a.** Relative Risk Ratios for violence outcomes and substance use behaviors by demographic characteristics (RR [95% CIs], p values)

|                                 | Victim of<br>violence<br>n= 18885   | Perpetrator of<br>violence<br>n= 18876 | Incarcerated<br>(ever)<br>n= 15252   | Smoking<br>n= 21689                 | Binge<br>drinking<br>n= 19194       | Cannabis<br>use (ever)<br>n= 21631  |
|---------------------------------|-------------------------------------|----------------------------------------|--------------------------------------|-------------------------------------|-------------------------------------|-------------------------------------|
| <i>Age</i>                      |                                     |                                        |                                      |                                     |                                     |                                     |
| 60-69                           | 0.1 [0.1, 1.1]<br><b>p &lt;.001</b> | 0.1 [0.1, 0.2]<br><b>p&lt;.001</b>     | 0.6 [0.5, 0.7]<br><b>p&lt;.001</b>   | 0.5 [0.4, 0.5]<br><b>p &lt;.001</b> | 0.5 [0.5, 0.6]<br><b>p &lt;.001</b> | 0.3 [0.2, 0.3]<br><b>p &lt;.001</b> |
| 50-59                           | 0.2 [0.2, 0.3]<br><b>p &lt;.001</b> | 0.2 [0.2, 0.3]<br><b>p &lt;.001</b>    | 1.0 [0.8, 1.1]<br>p =.769            | 0.7 [0.7, 0.8]<br><b>p &lt;.001</b> | 0.9 [0.8, 1.0]<br><b>p = .004</b>   | 0.5 [.04, 0.5]<br><b>p &lt;.001</b> |
| 40-49                           | 0.4 [0.3, 0.5]<br><b>p&lt;.001</b>  | 0.4 [0.3, 0.5]<br><b>p&lt;.001</b>     | 1.0 [0.9, 1.2]<br>p = .682           | 0.8 [0.7, 0.9]<br><b>p &lt;.001</b> | 0.9 [0.8, 1.0]<br><b>p =.006</b>    | 0.7 [0.6, 0.8]<br><b>p &lt;.001</b> |
| 30-39                           | 0.6 [0.5, 0.7]<br><b>p&lt;.001</b>  | 0.6 [0.5, 0.7]<br><b>p&lt;.001</b>     | 1.1 [1.0, 1.3]<br>p =.173            | 0.9 [0.8, 1.0]<br><b>p = .040</b>   | 0.8 [0.7, 0.9]<br><b>p &lt;.001</b> | 0.9 [0.8,1.0]<br><b>p = .012</b>    |
| 18-29*                          | .                                   | .                                      | .                                    | .                                   | .                                   | .                                   |
| <i>Gender</i>                   |                                     |                                        |                                      |                                     |                                     |                                     |
| Female                          | 0.5 [0.4, 0.6]<br><b>p&lt;.001</b>  | [0.4, 0.6]<br><b>p&lt;.001</b>         | 0.2 [0.2, 0.3]<br><b>p &lt;.001</b>  | 0.8 [0.7, 0.8]<br><b>p &lt;.001</b> | 0.5 [0.5, 0.6]<br><b>p &lt;.001</b> | 0.6 [0.5, 0.6]<br><b>p &lt;.001</b> |
| Male*                           | .                                   | .                                      | .                                    | .                                   | .                                   | .                                   |
| <i>Ethnicity</i>                |                                     |                                        |                                      |                                     |                                     |                                     |
| Other than white                | 0.8 [0.1, 0.9]<br><b>p = .005</b>   | 0.8 [0.7, 1.0]<br>p=.104               | 0.5 [0.4, 0.7]<br><b>p&lt;.001</b>   | 0.4 [0.4, 0.5]<br><b>p &lt;.001</b> | 0.3 [0.2, 0.4]<br><b>p &lt;.001</b> | 0.4 [0.4, 0.5]<br><b>p &lt;.001</b> |
| White*                          | .                                   | .                                      | .                                    | .                                   | .                                   | .                                   |
| <i>Deprivation<br/>Quintile</i> |                                     |                                        |                                      |                                     |                                     |                                     |
| 5 Most deprived                 | 1.2 (1.0, 1.5)<br>p = .052          | 1.2 [1.0, 1.5]<br>p = 0.69             | 2.3 [1.9, 2.7]<br><b>p &lt;.001</b>  | 2.1 [1.9, 2.3]<br><b>p&lt;.001</b>  | 0.9 [0.8, 1.0]<br>p = .112          | 1.1 [1.0, 1.2]<br>p = .184          |
| 4                               | 1.2 [1.0, 1.5]<br>p = .072          | 1.2 [1.0, 1.5]<br>p = .083             | 1.8 [1.5, 2.2]<br><b>p &lt; .001</b> | 1.6 [1.4, 1.7]<br><b>p &lt;.001</b> | 0.7 [1.0, 0.9]<br>p = .701          | 1.0 [0.9, 1.2]<br>p = .456          |
| 3                               | 1.1 [0.9, 1.4]<br>p= .293           | 1.0 [0.8, 1.3]<br>p = .873             | 1.5 [ 1.3, 1.9]<br>p <.001           | 1.4 [1.2, 1.5]<br><b>p &lt;.001</b> | 1.0 [0.9, 1.1]<br>p = .886          | 1.1 [1.0, 1.2]<br>p =.313           |
| 2                               | 1.1 [0.9, 1.4]<br>p = .252          | 1.1 [0.9, 1.4]<br>p = .297             | 1.2 [1.0, 1.5]<br>p = .085           | 1.3 [1.1, 1.4]<br><b>p &lt;.001</b> | 1.0 [0.9, 1.1]<br>p = .736          | 1.1 [1.0, 1.2]<br>p = .375          |
| 1 Least deprived*               | .                                   | .                                      | .                                    | .                                   | .                                   | .                                   |

*Note:* \*This denotes the variable was the reference category across analyses. Significant effects in bold.

**Table S4b.** Relative Risk Ratios for health harming behaviors and mental health outcomes by demographic characteristics (RR [95% CIs], p values)

|                             | STI (ever)<br>n= 18054              | Early sexual<br>initiation<br>n= 10860 | Accidental<br>teenage<br>n= 12682          | Low life<br>satisfaction<br>n= 10729 | Any mental<br>illness<br>n= 5293    |
|-----------------------------|-------------------------------------|----------------------------------------|--------------------------------------------|--------------------------------------|-------------------------------------|
| <i>Age</i>                  |                                     |                                        |                                            |                                      |                                     |
| 60-69                       | 0.4 [0.3, 0.6]<br><b>p &lt;.001</b> | 0.3 [0.2, 0.3]<br><b>p &lt;.001</b>    | 0.6 [0.5, 0.8]<br><b>p &lt;.001</b>        | 1.3 [1.1, 1.5]<br><b>p = .004</b>    | 0.9 [0.8, 1.0]<br><b>p = .034</b>   |
| 50-59                       | 0.6 [0.4, 0.8]<br><b>p &lt;.001</b> | 0.5 [0.4, 0.6]<br><b>p &lt;.001</b>    | 0.8 [0.7, 1.0]<br>p = .067                 | 1.8 [1.5, 2.1]<br><b>p &lt;.001</b>  | 1.0 [0.9, 1.08]<br>p = .462         |
| 40-49                       | 0.7 [0.6, 1.0]<br><b>p =.028</b>    | 0.6 [0.5, 0.7]<br><b>p &lt;.001</b>    | 0.9 [0.7, 1.0]<br>p =.111                  | 1.5 [1.3, 1.7]<br><b>p &lt;.001</b>  | 1.1 [1.0, 1.3]<br>p =.055           |
| 30-39                       | 1.1 [0.8, 1.4]<br>p = .586          | 0.7 [0.6, 0.8]<br><b>p &lt;.001</b>    | 0.8 [0.7, 1.0]<br><b>p = .018</b>          | 1.1 [0.9, 1.3]<br>p = .286           | 1.1 [1.0, 1.2]<br>p = .084          |
| 18-29*                      | .                                   | .                                      | .                                          | .                                    | .                                   |
| <i>Gender</i>               |                                     |                                        |                                            |                                      |                                     |
| Female                      | 0.8 [0.6, 1.0]<br><b>p = .009</b>   | 0.7 [0.7, 0.8]<br><b>p &lt;.001</b>    | 1.9 [1.6, 2.2]<br><b>p &lt;.001</b>        | 0.9 [0.8, 1.0]<br>p =.074            | 1.3 [1.2, 1.4]<br><b>p &lt;.001</b> |
| Male*                       | .                                   | .                                      | .                                          | .                                    | .                                   |
| <i>Ethnicity</i>            |                                     |                                        |                                            |                                      |                                     |
| Other than white            | 0.4 [0.3, 0.6]<br><b>p &lt;.001</b> | 0.4 [0.3, 0.4]<br><b>p &lt;.001</b>    | 0.4 [0.3, 0.5]<br><b>p &lt;.001</b>        | 0.8 [0.7, 1.0]<br>p = .286           | 0.6 [0.5, 0.7]<br><b>p &lt;.001</b> |
| White                       | .                                   | .                                      | .                                          | .                                    | .                                   |
| <i>Deprivation Quintile</i> |                                     |                                        |                                            |                                      |                                     |
| Most deprived               | 1.1 [0.8, 1.4]<br>p = .677          | 1.5 [1.3, 1.7]<br><b>p &lt;.001</b>    | <b>1.8 [1.4, 2.2]</b><br><b>p &lt;.001</b> | 2.1 [1.8, 2.5]<br><b>p &lt;.001</b>  | 1.3 [1.2, 1.5]<br><b>p &lt;.001</b> |
| 4                           | 1.0 [0.8, 1.4]<br>p = .779          | 1.2 [1.05, 1.4]<br><b>p = .012</b>     | 1.5 [1.2, 1.8]<br><b>p &lt;.001</b>        | 1.6 [1.4, 1.9]<br><b>p &lt;.001</b>  | 1.2 [1.1, 1.4]<br><b>p = .003</b>   |
| 3                           | 1.0 [0.7, 1.3]<br>p = .723          | 1.3 [1.2, 1.6]<br><b>p &lt;.001</b>    | 1.7 [1.4, 2.1]<br><b>p &lt;.001</b>        | 1.3 [1.1, 1.6]<br><b>p = .003</b>    | 1.1 [1.0, 1.3]<br>p = .066          |
| 2                           | 0.9 [0.7, 1.2]<br>p =.460           | 1.1 [1.0, 1.3]<br>p = .091             | 1.4 [1.2, 1.8]<br><b>p =.001</b>           | 1.05 [0.9, 1.3]<br>p = .620          | 1.0 [0.9, 1.2]<br>p = .650          |
| 1 Least deprived*           | .                                   | .                                      | .                                          | .                                    | .                                   |

*Note:* \*This denotes the variable was the reference category across analyses. Significant effects in bold.



**Table S5.** Estimated Marginal Means for all individual ACE exposures and combinations, including excess risk

| ACE Exposure                                 | Estimated Marginal Means (%) | ACE categories summed (%) * | Excess risk (%) † |
|----------------------------------------------|------------------------------|-----------------------------|-------------------|
| <b>VICTIM OF VIOLENCE</b>                    |                              |                             |                   |
| No ACEs                                      | 1.8%                         | .                           | .                 |
| Household dysfunction only                   | 3.2%                         | .                           | .                 |
| Witnessed violence only                      | 2.9%                         | .                           | .                 |
| Child maltreatment only                      | 3.8%                         | .                           | .                 |
| Household dysfunction and witnessed violence | 6.6%                         | 2.5%                        | 2.4%              |
| Child maltreatment and household dysfunction | 7.2%                         | 3.4%                        | 2.0%              |
| Child maltreatment and witnessed violence    | 7.0%                         | 3.1%                        | 2.2%              |
| All three ACEs                               | 10.2%                        | 4.5%                        | 3.9%              |
| <b>PERPETRATOR OF VIOLENCE</b>               |                              |                             |                   |
| No ACEs                                      | 1.2%                         | .                           | .                 |
| Household dysfunction only                   | 2.9%                         | .                           | .                 |
| Witnessed violence only                      | 1.3%                         | .                           | .                 |
| Child maltreatment only                      | 3.4%                         | .                           | .                 |
| Household dysfunction and witnessed violence | 5.6%                         | 1.7%                        | 2.6%              |
| Child maltreatment and household dysfunction | 6.0%                         | 3.8%                        | 1.0%              |
| Child maltreatment and witnessed violence    | 5.1%                         | 2.2%                        | 1.7%              |
| All three ACEs                               | 8.9%                         | 3.9%                        | 3.8%              |
| <b>INCARCERATION</b>                         |                              |                             |                   |
| No ACEs                                      | 2.3%                         | .                           | .                 |
| Household dysfunction only                   | 5.3%                         | .                           | .                 |
| Witnessed violence only                      | 4.7%                         | .                           | .                 |
| Child maltreatment only                      | 4.9%                         | .                           | .                 |
| Household dysfunction and witnessed violence | 8.0%                         | 5.4%                        | 0.3%              |
| Child maltreatment and household dysfunction | 8.1%                         | 5.6%                        | 0.2%              |
| Child maltreatment and witnessed violence    | 7.7%                         | 4.9%                        | 0.5%              |
| All three ACEs                               | 13.1%                        | 7.9%                        | 2.9%              |
| <b>BINGE DRINKING</b>                        |                              |                             |                   |
| No ACEs                                      | 8.5%                         | .                           | .                 |
| Household dysfunction only                   | 10.3%                        | .                           | .                 |
| Witnessed violence only                      | 10.2%                        | .                           | .                 |
| Child maltreatment only                      | 10.5%                        | .                           | .                 |
| Household dysfunction and witnessed violence | 11.9%                        | 3.5%                        | -0.1%             |
| Child maltreatment and household dysfunction | 10.6%                        | 3.8%                        | -1.8%             |
| Child maltreatment and witnessed violence    | 11.2%                        | 3.7%                        | -1.0%             |
| All three ACEs                               | 14.8%                        | 5.5%                        | 0.7%              |
| <b>CANNABIS USE (EVER)</b>                   |                              |                             |                   |
| No ACEs                                      | 7.7%                         | .                           | .                 |
| Household dysfunction only                   | 13.2%                        | .                           | .                 |
| Witnessed violence only                      | 10.9%                        | .                           | .                 |
| Child maltreatment only                      | 13.8%                        | .                           | .                 |

|                                              |       |       |       |
|----------------------------------------------|-------|-------|-------|
| Household dysfunction and witnessed violence | 15.6% | 8.8%  | -0.9% |
| Child maltreatment and household dysfunction | 19.5% | 11.7% | 0.1%  |
| Child maltreatment and witnessed violence    | 14.1% | 9.4%  | -2.9% |
| All three ACEs                               | 21.9% | -0.7% | 14.9% |
| <b>EARLY SEXUAL INTITATION</b>               |       |       |       |
| No ACEs                                      | 8.0%  | .     | .     |
| Household dysfunction only                   | 12.8% | .     | .     |
| Witnessed violence only                      | 8.6%  | .     | .     |
| Child maltreatment only                      | 13.2% | .     | .     |
| Household dysfunction and witnessed violence | 15.0% | 5.4%  | 1.6%  |
| Child maltreatment and household dysfunction | 17.3% | 10.1% | -0.8% |
| Child maltreatment and witnessed violence    | 14.9% | 5.8%  | 1.1%  |
| All three ACEs                               | 20.4% | 10.7% | 1.7%  |
| <b>SEXUALLY TRANSMITTED INFECTION (EVER)</b> |       |       |       |
| No ACEs                                      | 0.9%  | .     | .     |
| Household dysfunction only                   | 1.9%  | .     | .     |
| Witnessed violence only                      | 1.0%  | .     | .     |
| Child maltreatment only                      | 1.8%  | .     | .     |
| Household dysfunction and witnessed violence | 2.5%  | 1.2%  | 0.5%  |
| Child maltreatment and household dysfunction | 2.5%  | 1.9%  | -0.3% |
| Child maltreatment and witnessed violence    | 2.9%  | 1.1%  | 0.9%  |
| All three ACEs                               | 3.6%  | 2.1%  | 0.6%  |
| <b>ACCIDENTAL TEENAGE PREGNANCY</b>          |       |       |       |
| No ACEs                                      | 3.2%  | .     | .     |
| Household dysfunction only                   | 5.1%  | .     | .     |
| Witnessed violence only                      | 4.4%  | .     | .     |
| Child maltreatment only                      | 5.6%  | .     | .     |
| Household dysfunction and witnessed violence | 5.4%  | 3.2%  | -1.0% |
| Child maltreatment and household dysfunction | 8.3%  | 4.4%  | 0.8%  |
| Child maltreatment and witnessed violence    | 9.0%  | 3.6%  | 2.2%  |
| All three ACEs                               | 12.4% | 5.6%  | 3.6%  |
| <b>LOW LIFE SATISFACTION</b>                 |       |       |       |
| No ACEs                                      | 7.5%  | .     | .     |
| Household dysfunction only                   | 12.1% | .     | .     |
| Witnessed violence only                      | 10.0% | .     | .     |
| Child maltreatment only                      | 13.5% | .     | .     |
| Household dysfunction and witnessed violence | 14.6% | 7.2%  | 0.0%  |
| Child maltreatment and household dysfunction | 22.4% | 10.6% | 4.3%  |
| Child maltreatment and witnessed violence    | 12.6% | 8.5%  | -3.4% |
| All three ACEs                               | 23.7% | 13.2% | 3.0%  |
| <b>ANY MENTAL HEALTH DIAGNOSIS (EVER)</b>    |       |       |       |
| No ACEs                                      | 17.9% | .     | .     |
| Household dysfunction only                   | 30.6% | .     | .     |
| Witnessed violence only                      | 21.5% | .     | .     |
| Child maltreatment only                      | 27.9% | .     | .     |

|                                              |       |       |        |
|----------------------------------------------|-------|-------|--------|
| Household dysfunction and witnessed violence | 21.2% | 16.4% | -13.1% |
| Child maltreatment and household dysfunction | 37.8% | 22.7% | -2.8%  |
| Child maltreatment and witnessed violence    | 28.1% | 13.7% | -3.5%  |
| All three ACEs                               | 36.7% | 26.4% | -7.6%  |
| <b>SMOKING</b>                               |       |       |        |
| No ACEs                                      | 12.2% | .     | .      |
| Household dysfunction only                   | 15.1% | .     | .      |
| Witnessed violence only                      | 12.7% | .     | .      |
| Child maltreatment only                      | 15.6% | .     | .      |
| Household dysfunction and witnessed violence | 18.0% | 3.4%  | 2.4%   |
| Child maltreatment and household dysfunction | 19.3% | 6.3%  | 0.8%   |
| Child maltreatment and witnessed violence    | 17.7% | 3.9%  | 1.7%   |
| All three ACEs                               | 24.0% | 6.8%  | 5.0%   |

*Note:* \*This denotes the percentage of risk of each individual ACE category added to the other whilst subtracting the baseline effects (e.g., No ACEs). † This denotes the excess risk over and above what would be expected when two or more ACE categories are combined.

## Supplementary S2

Methods for calculating additive risk (adapted methods from Andersson et al., 2005)

1. Estimated Marginal Means for each level of the predictor (000, 001, 011, 010, 110, 100, 101, 111) were entered into excel and converted into percentages.
2. The baseline risk (000) was subtracted from the raw percentages of each level of the predictor. This was to ensure estimates accounted for baseline effects.
3. Then, the percentages from individual ACE categories were summed using percentages from step 2 to give an *expected value* of all two way and three-way ACE category combinations (i.e.,  $001 + 010 = 011$ ,  $100 + 010 = 110$ ,  $001 + 100 = 101$ ,  $001 + 101 + 010 = 111$ ). This accounted for baseline effects.
4. Then, the *expected* values from step 3 (e.g.,  $001 + 010 = 011$ ) were subtracted from the *observed* percentages of risk for all two way and three-way ACE category combinations (011, 110, 101, 111). This gave us a percentage of *excess risk*. That is, the percentage of risk observed when two or more ACE categories co-occur over and above what would be expected by summing their individual effects.

*\*Excel calculator template can be provided upon request*
